# Supplementary material for: B cell analysis in SARS-CoV-2 versus malaria: Increased frequencies of plasmablasts and atypical memory B cells in COVID-19
Source: PubMed Central journal article supplement — J Leukoc Biol. 2020 Dec 4;109(1):77–90. doi: 10.1002/JLB.5COVA0620-370RR (PMC10016889; doi:10.1002/jlb.5cova0620-370rr), 2020-12-04
Supplement: jlb10851-sup-0001-suppmat.pdf [file jlb10851-sup-0001-suppmat.pdf]

## Supplementary Figure 1

| Panel 1 | Panel 2 | Panel 3 |
|---------|---------|---------|
| CD21    | CD21    | CD21    |
| CD20    | CD39    | CD39    |
| CD73    | PD-1    | PD-1    |
| CD24    | CD20    | CD20    |
| CD38    | CD73    | CD73    |
| CD27    | CD24    | CD24    |
| IgM     | CD38    | CD38    |
| IgD     | CD27    | CD27    |
| CD86    | IgM     | IgM     |
| CD11c   | IgD     | IgG     |
| CD39    | CD86    | CD138   |
| CXCR3   | CD11c   | CD11c   |
| CD19    | CD19    | CD19    |
| L/D     | CXCR3   | T-bet   |
|         | CD3     | CD3     |
|         | L/D     | L/D     |

Supplementary Figure 1: Overview of panels used for flow cytometry. All markers were stained on the cell surface except for T-bet in panel 3.

Supplementary Figure 2

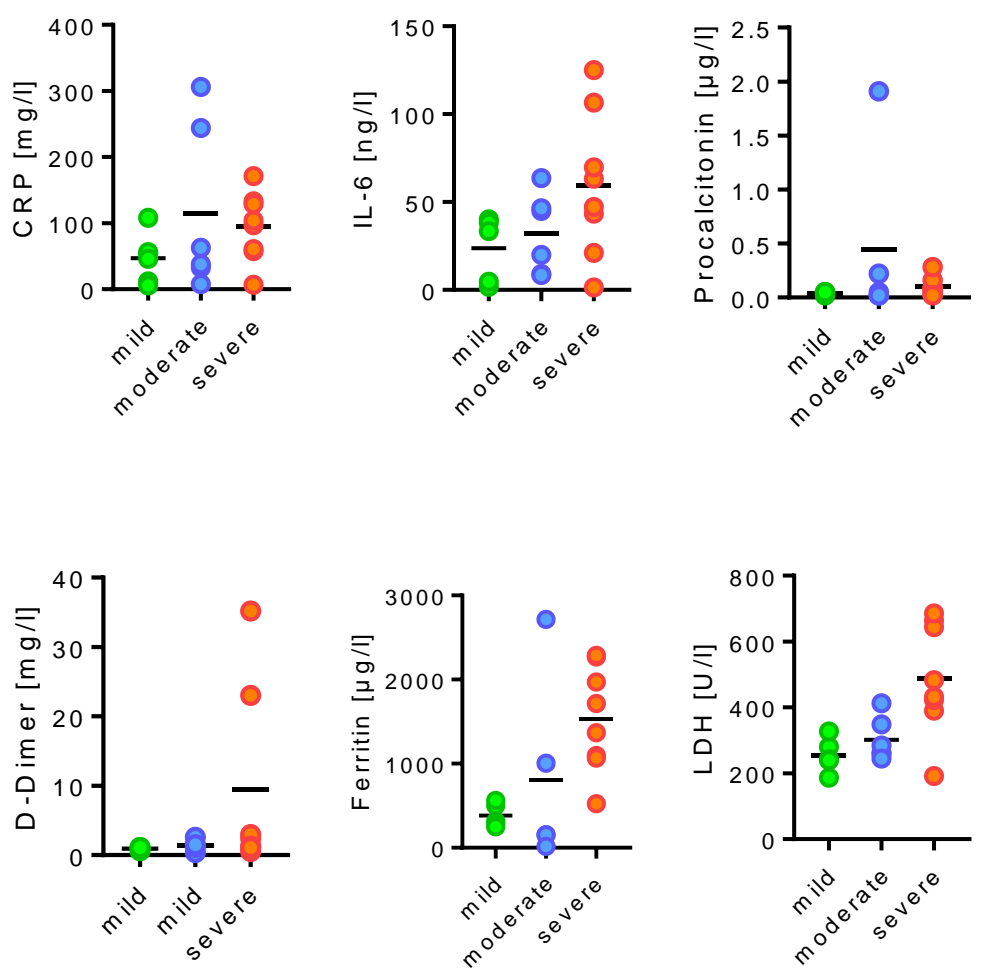

Supplementary Figure 2: Clinical laboratory parameters measured for COVID-19 patients classified in mild, moderate and severe disease course according to the WHO criteria for COVID-19.

### Supplementary Figure 3

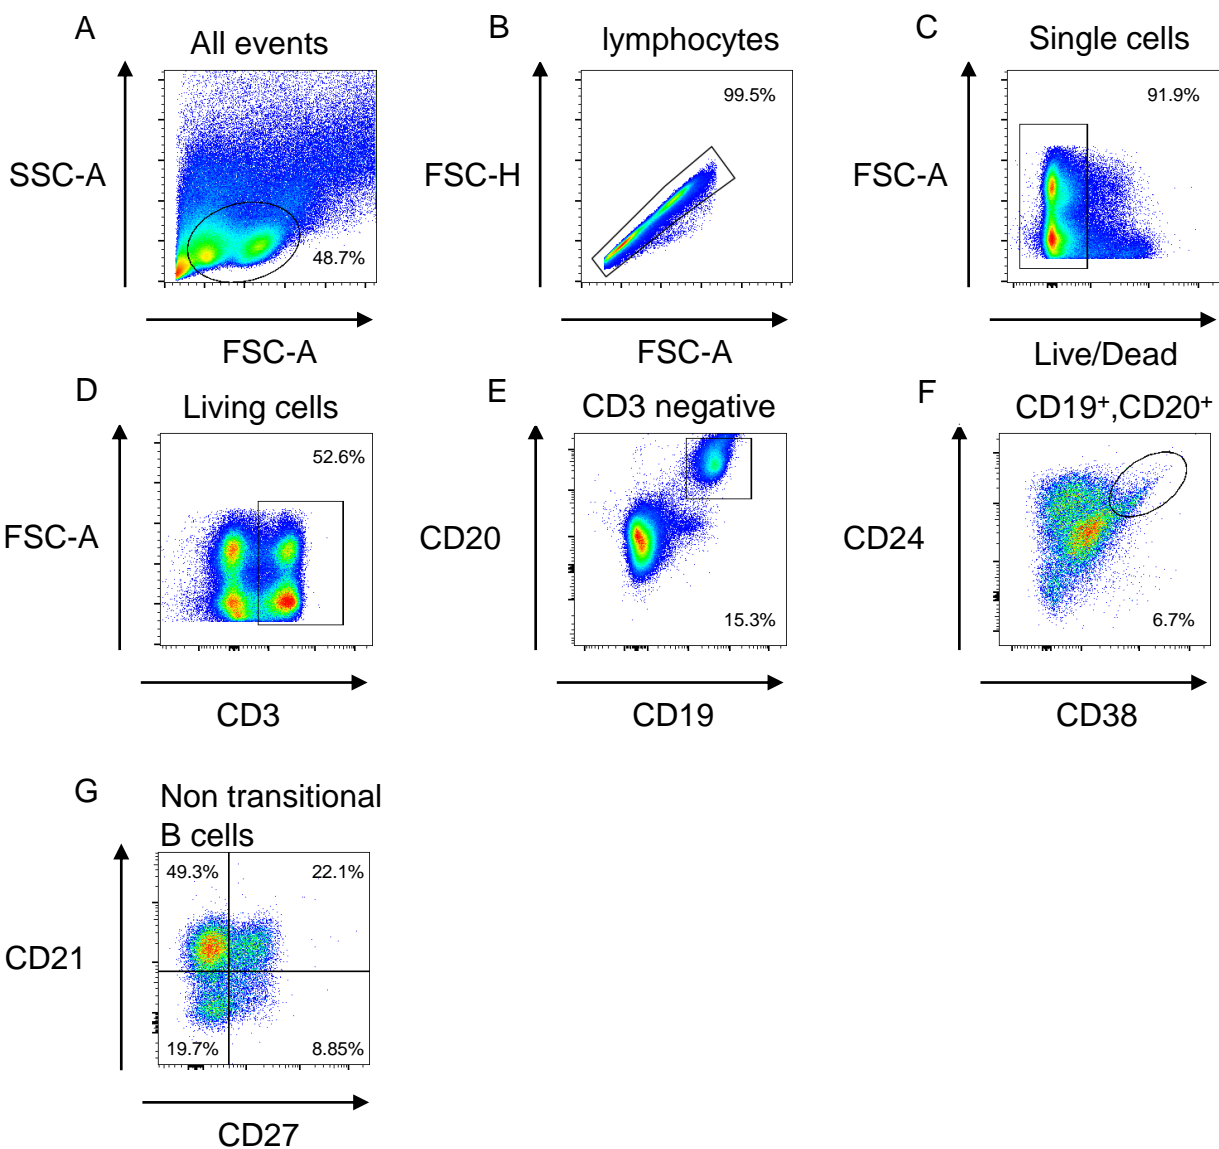

Supplementary Figure 3: **(A)** First, Lymphocytes were identified by forward scatter (FSC) and side scatter (SSC) gate. **(B)** Single cells were gated by a forward scatter height (FSC-H) and forward scatter area (FSC-A) gate. **(C)** Living cells were included only. **(D)** Only CD3 negative cells were included. **(E)** B cells were identified by CD19<sup>+</sup> and CD20<sup>+</sup> co expression. **(F)** CD24<sup>+</sup> and CD38<sup>+</sup> were selected to identify transitional B cells. **(G)** Naïve and memory subsets were identified using CD21 and CD27.

## Supplementary Figure 4

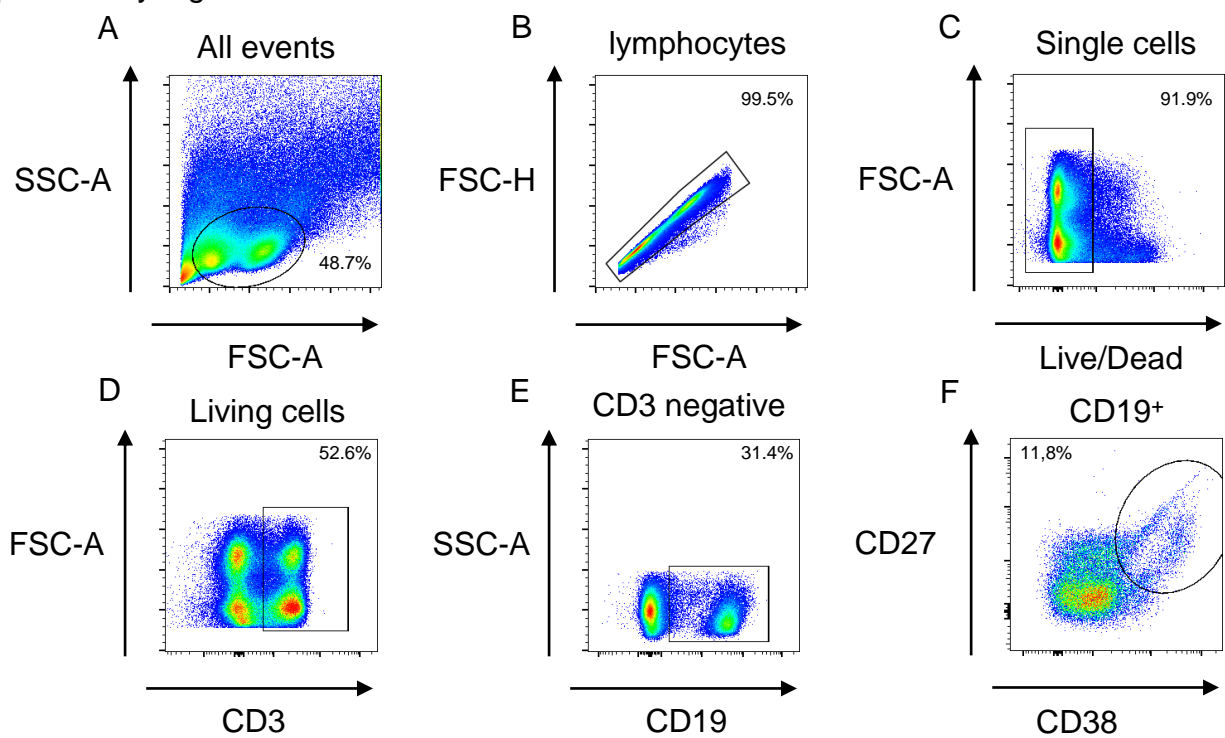

Supplementary Figure 4: **(A)** First, Lymphocytes were identified by forward scatter (FSC) and side scatter (SSC) gate. **(B)** Single cells were gated by a forward scatter height (FSC-H) and forward scatter area (FSC-A) gate. **(C)** Living cells were included only. **(D)** Only CD3 negative cells were included. **(E)** B cells were identified by CD19<sup>+</sup>. **(F)** CD27<sup>+</sup> and CD38<sup>+</sup> were selected to identify plasmablasts

Supplementary Figure 5

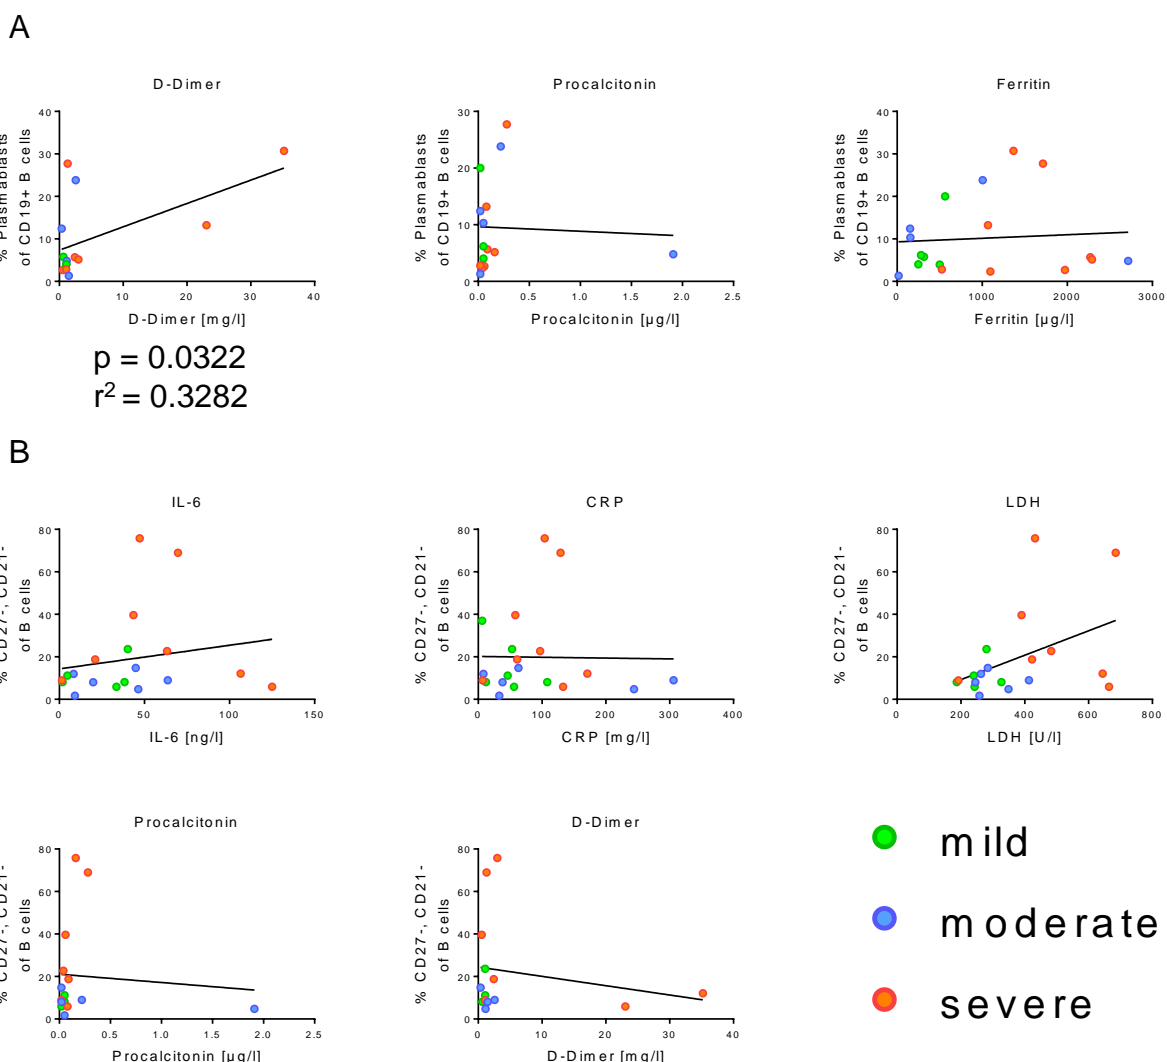

Supplementary Figure 5: Correlations between IL-6, CRP, LDH, procalcitonin, D-Dimer and ferritin levels and frequencies of (A) plasmablasts on CD19+ B cells and (B) atypical memory B cells on CD19+CD20+ B cells in COVID-19 patients. For bivariate correlation analysis the Spearman correlation and Pearson correlation were applied. P-values smaller than 0.05 were considered significant.

Supplementary Figure 6

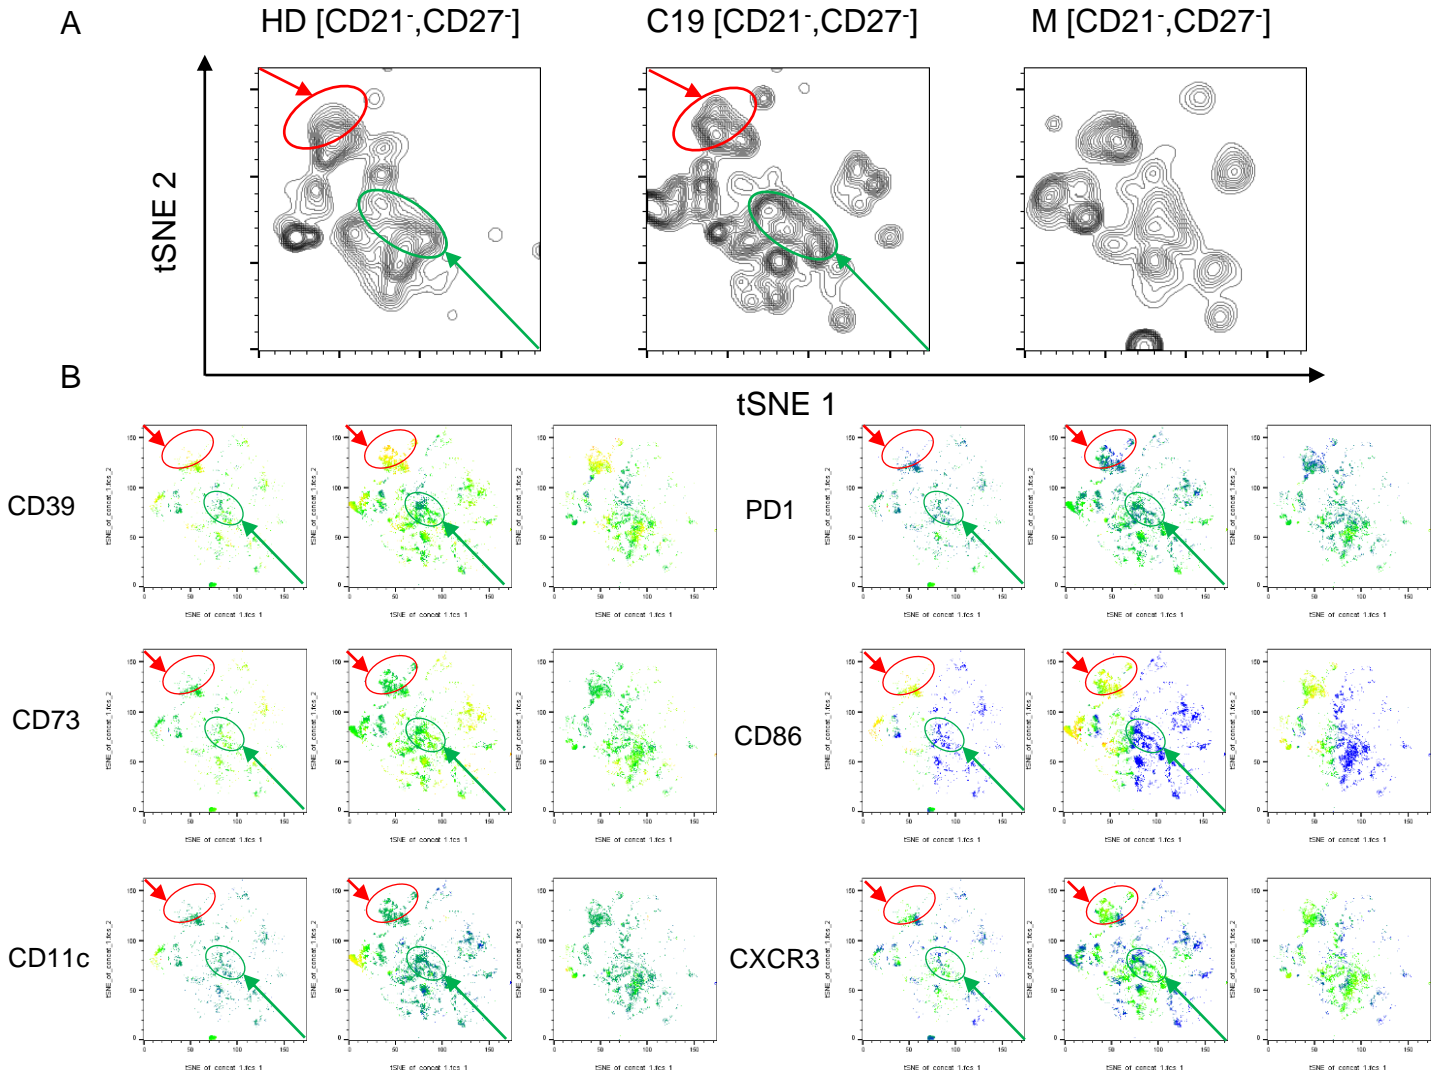

Supplementary Figure 6: **(A)** FlowJo tSNE projection of atypical memory B cells (contour plot) from healthy donors (HD), COVID-19 (C19), and malaria (M) patients. Red circle: high expression of CD39, CD86, and CXCR3, green circle: high expression of PD-1 and low expression of CD86 and CXCR3 **(B)** tSNE projections are shown of the expression of the indicated surface molecules on CD21-CD27<sup>-</sup> atypical memory B cells.

Supplementary Figure 7

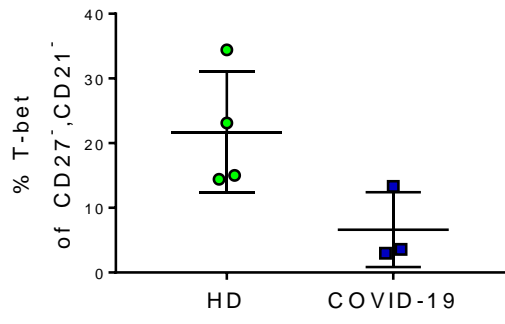

Supplementary Figure 7: Frequency of cells expressing T-bet among atypical memory B cells in healthy donors (HD) and COVID-19 patients.

Supplementary Figure 8

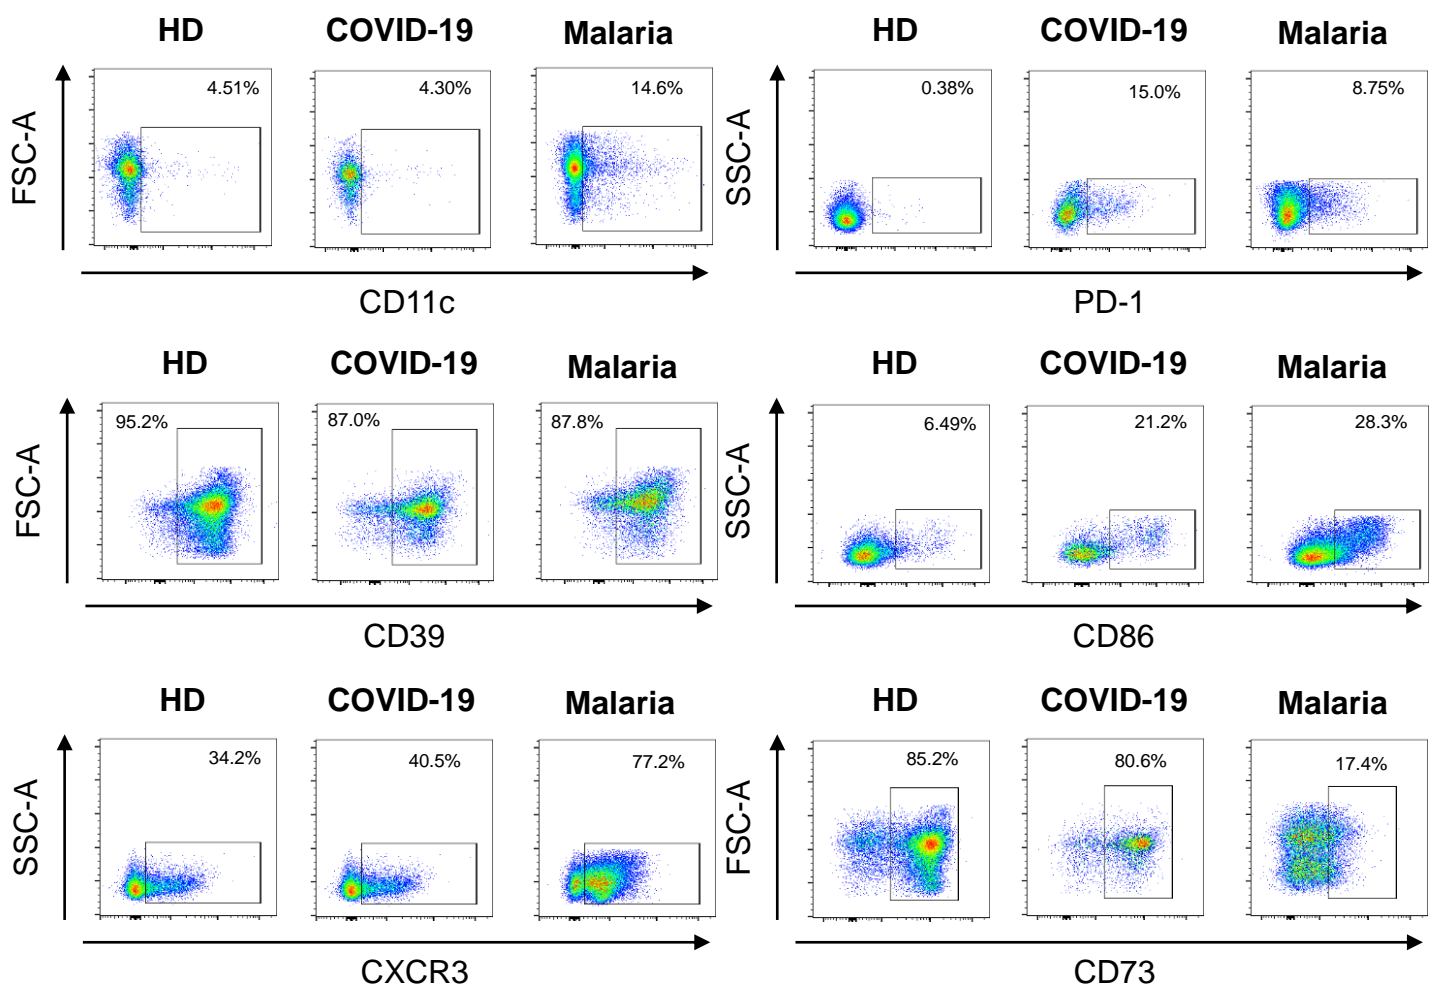

Supplementary Figure 8: Representative dot plots of CD11c, PD-1, CD39, CD86, CXCR3 and CD73 on CD19<sup>+</sup>,CD20<sup>+</sup> B cells for healthy donors (HD), COVID-19 and malaria patients.



Supplementary Figure 9

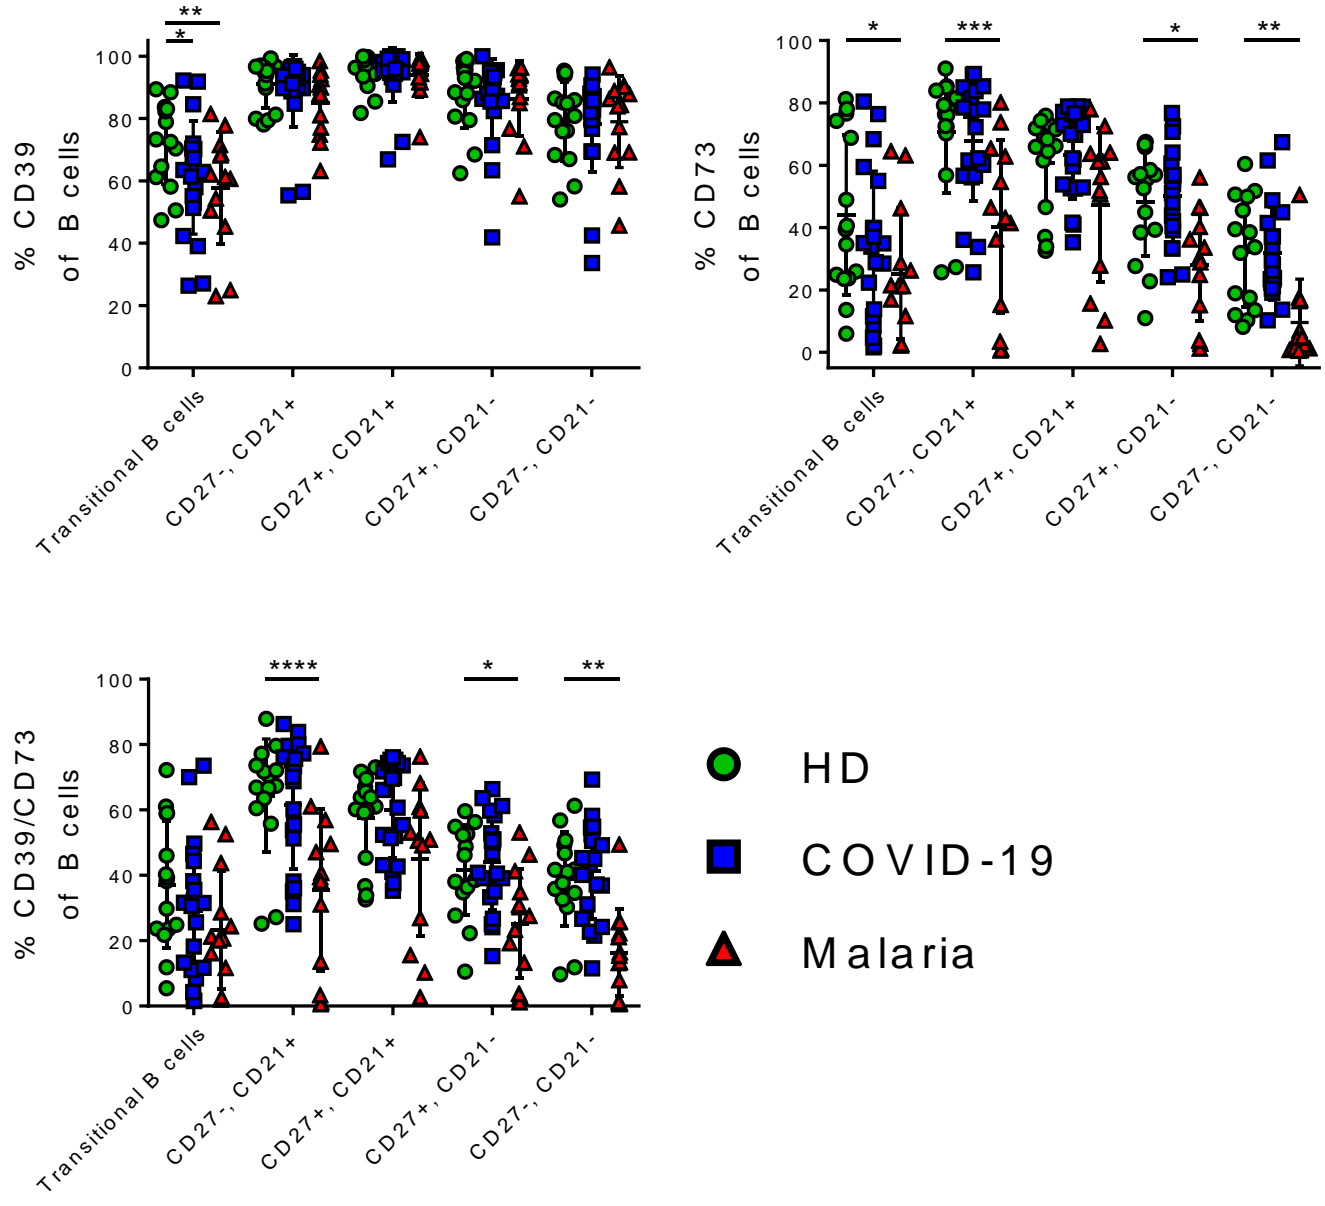

Supplementary Figure 9: Frequencies of CD39<sup>+</sup> and CD73<sup>+</sup> B cells at different stages of differentiation in HD, COVID-19 and malaria. Data are shown as mean ± SD, where \*, \*\*, \*\*\* and \*\*\*\* indicate p-values <0.05, <0.01, <0.001, and <0.0001.

Supplementary Figure 9

A

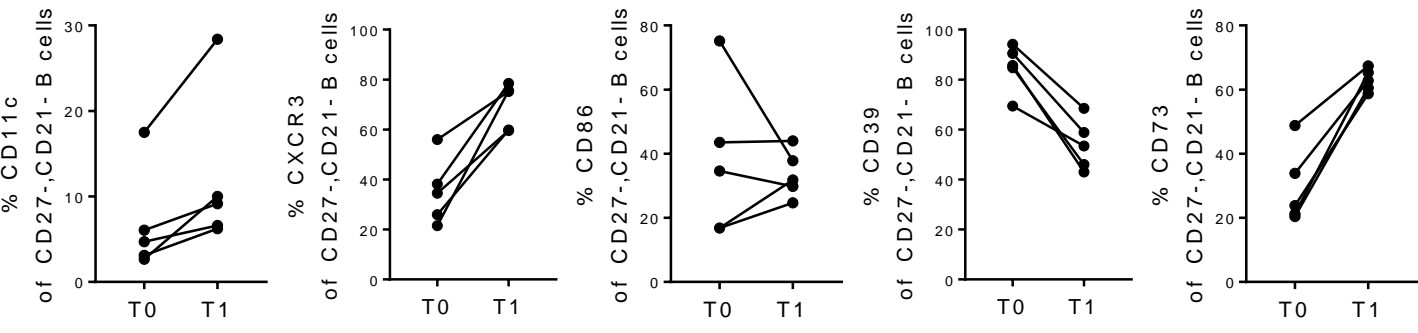

B

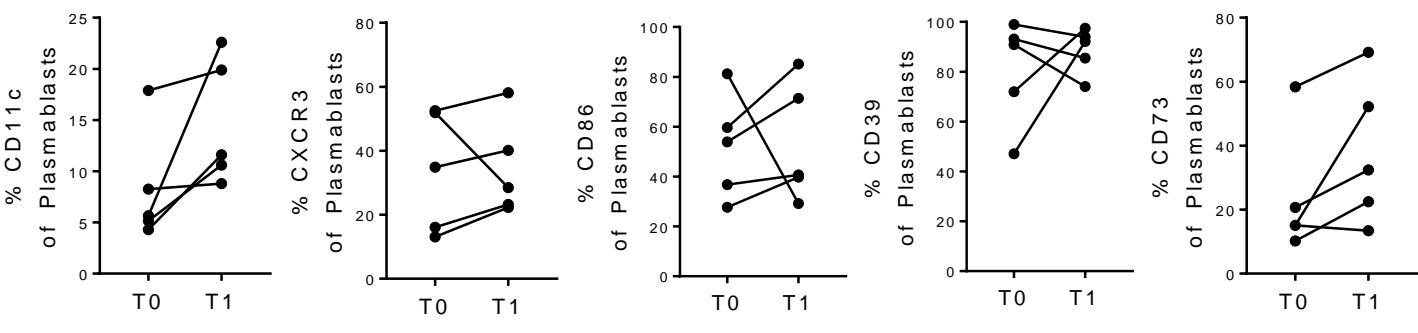

Supplementary Figure 9: Longitudinal analysis of the frequency of CD11c<sup>+</sup>, CXCR3<sup>+</sup>, CD86<sup>+</sup>, CD39<sup>+</sup> and CD73<sup>+</sup> (A) CD27<sup>-</sup>,CD21<sup>-</sup> B cells and (B) plasmablasts in COVID-19 patients.

Supplementary Table 1: COVID-19 cohort and COVID-19 disease severity

|                                | COVID-19     |                 |                 |
|--------------------------------|--------------|-----------------|-----------------|
|                                | mild         | moderate        | severe          |
| <b>Patient characteristics</b> |              |                 |                 |
| age [years]                    | 51.5 ± 13.70 | 49.3 ± 10.62    | 65.4 ± 8.5      |
| sex [female/male]              | 1 5          | 3 3             | 1 7             |
| <b>Blood pressure</b>          |              |                 |                 |
| systolic RR [mean]             | 123.1 ± 8.8  | 129.3 ± 11.0    | 122.8 ± 9.5     |
| diastolic RR [mean]            | 76.3 ± 2.0   | 77.6 ± 3.8      | 72.9 ± 4.1      |
| <b>Respiration</b>             |              |                 |                 |
| SpO2 [max]                     | 97.1 ± 1.3   | 95.8 ± 1.2      | 92.6 ± 1.2      |
| SpO2 [min]                     | 95.7 ± 1.6   | 91.6 ± 1.8      | 81.4 ± 8.3      |
| respiratory rate [mean]        | 15.2 ± 1.4   | 17.3 ± 3.0      | 17.2 ± 2.1      |
| respiratory rate [max]         | 18.2 ± 4.7   | 23.0 ± 6.7      | 25.25 ± 8.1     |
| pneumonia                      | 2 / 6        | 4 / 6           | 8 / 8           |
| <b>Clinical chemistry</b>      |              |                 |                 |
| CRP [max]                      | 55.3 ± 35.6  | 167.6 ± 159.1   | 173.75 ± 78.9   |
| IL-6 [max]                     | 24.2 ± 18.2  | 72.52 ± 80.6    | 1356 ± 3443     |
| Ferritin [max]                 | 391.4 ± 14.2 | 1072.025 ± 1393 | 2016.75 ± 756.3 |
| <b>Hospital</b>                |              |                 |                 |
| time in hospital [mean]        | 3.84 ± 1.6   | 6.6 ± 2.7       | 13.125 ± 6.8    |
| time ICU [mean]                |              |                 | 8               |

Supplementary Table 2: Longitudinal Analysis of SARS-CoV-2 IgM and IgG production

| <b>Sample ID</b> | <b>sample date</b> | <b>Assay</b> | <b>value</b> | <b>result</b> |
|------------------|--------------------|--------------|--------------|---------------|
| C19-01           | 9                  | IgM          | 0.1          | negative      |
|                  | 24                 | IgM          | 13           | positive      |
|                  | 9                  | IgG          | <3.80        | negative      |
|                  | 24                 | IgG          | 136          | positive      |
| C19-04           | 13                 | IgM          | 0.215        | negative      |
|                  | 26                 | IgM          | 11,1         | positive      |
|                  | 13                 | IgG          | <3.80        | negative      |
|                  | 26                 | IgG          | 318          | positive      |
| C19-06           | 12                 | IgM          | 0.346        | negative      |
|                  | 27                 | IgM          | 0.167        | negative      |
|                  | 12                 | IgG          | <3.80        | negative      |
|                  | 27                 | IgG          | <3.80        | negative      |
| C19-16           | 22                 | IgM          | 5.29         | positive      |
|                  | 112                | IgM          | 0.616        | negative      |
|                  | 22                 | IgG          | 55.3         | Positive      |
|                  | 112                | IgG          | 37           | Positive      |
| C19-19           | 21                 | IgM          | 7.66         | Positive      |
|                  | 107                | IgM          | 0.168        | Negative      |
|                  | 21                 | IgG          | 168          | Positive      |
|                  | 107                | IgG          | 136          | Positive      |
